# Supplementary material for: Strong metal–support interaction improves activity and stability of Pt electrocatalysts on doped metal oxides
Source: Royal Society of Chemistry journal article supplement (doi:10.1039/c8cp00176f), 2018-01-01
Supplement: c8cp00176f1.pdf [file c8cp00176f1.pdf]

## SUPPORTING INFORMATION

### Strong metal-support interaction improves activity and stability of Pt electrocatalysts on doped metal oxides

Ignacio Jiménez-Morales, Sara Cavaliere\*, Deborah Jones, Jacques Rozière

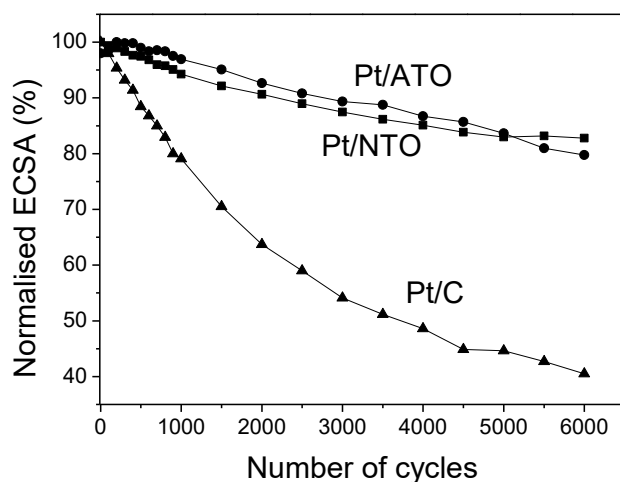

Figure SI1. ECSA variation as a function of number of electrochemical cycles for the prepared electrocatalysts.

Chronoamperometry measurements were carried out to investigate the stability of the catalyst support at different potential values for a total duration of 4 hours (Figure SI.1), showing an excellent electrochemical stability up to 2.0 V/RHE. In addition, ICP-MS measurements of the electrolyte solution after this electrochemical test were performed demonstrating a negligible Sb loss (0.06 %<sub>at</sub> Sb from 10 %<sub>at</sub> ATO).

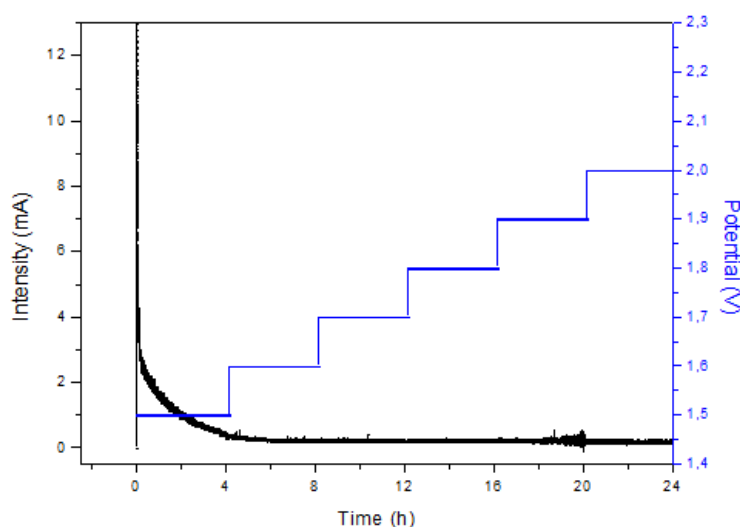

Figure S12. Chronoamperometry measurements on ATO from 1.5 to 2.0 V/RHE in 0.5 M H<sub>2</sub>SO<sub>4</sub> at 80 °C.
